# Supplementary material for: ISOexpresso: a web-based platform for isoform-level expression analysis in human cancer
Source: PubMed Central journal article supplement (PMC4983006; doi:10.1186/s12864-016-2852-6), 2016-08-12
Supplement: 12864_2016_2852_MOESM4_ESM.pdf [file 12864_2016_2852_MOESM4_ESM.pdf]

## Variant position in UCSC-based canonical isoform

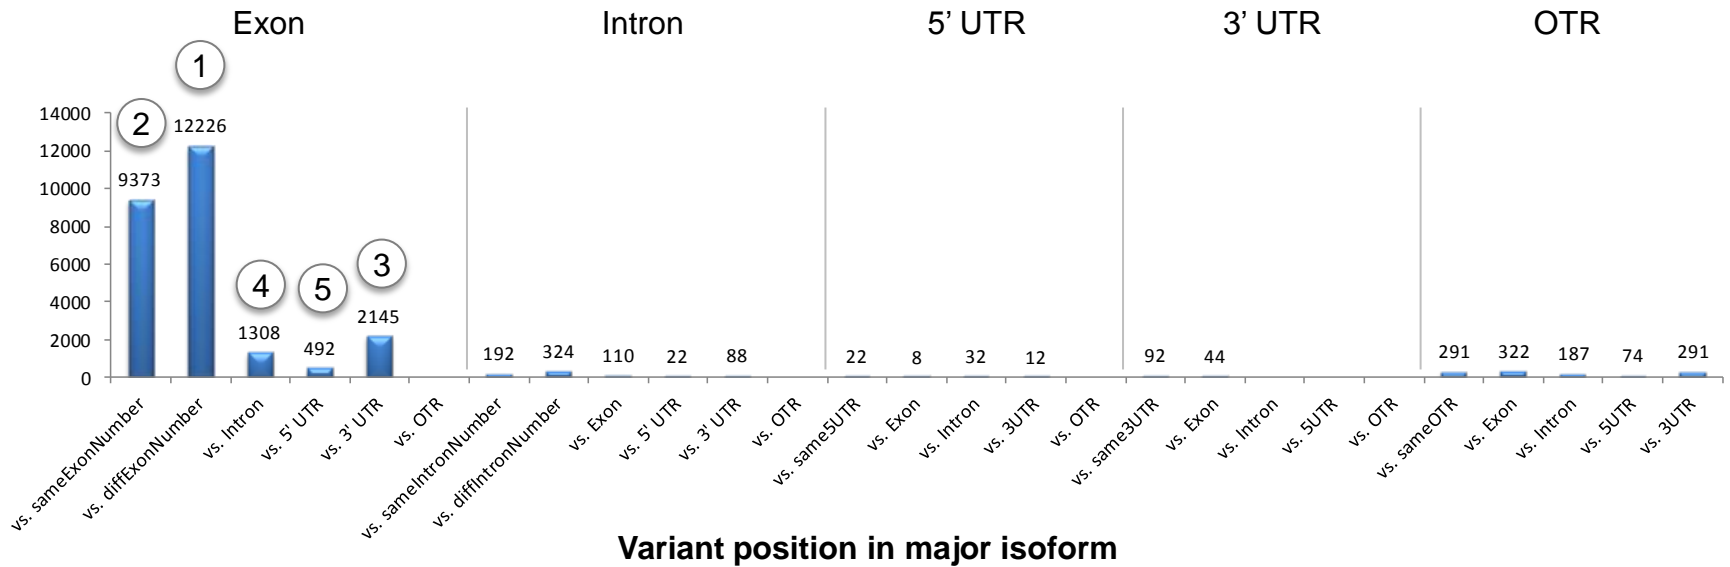

## Variant position in major isoform

Total variants examined = 147,540

Total mismatched cases between major and canonical isoforms = 29,669

Mismatched cases that canonical isoform is available = 27,655

Rank 1 =  $12,226 / 147,540 * 100 = 8.3\%$  → Annotations were changed in 743 cases (0.5%).

Rank 2 =  $9,373 / 147,540 * 100 = 6.4\%$

Rank 3 =  $2,145 / 147,540 * 100 = 1.5\%$

Rank 4 =  $1,308 / 147,540 * 100 = 0.9\%$

Rank 5 =  $492 / 147,540 * 100 = 0.3\%$

## Variant position in UniProt-based canonical isoform

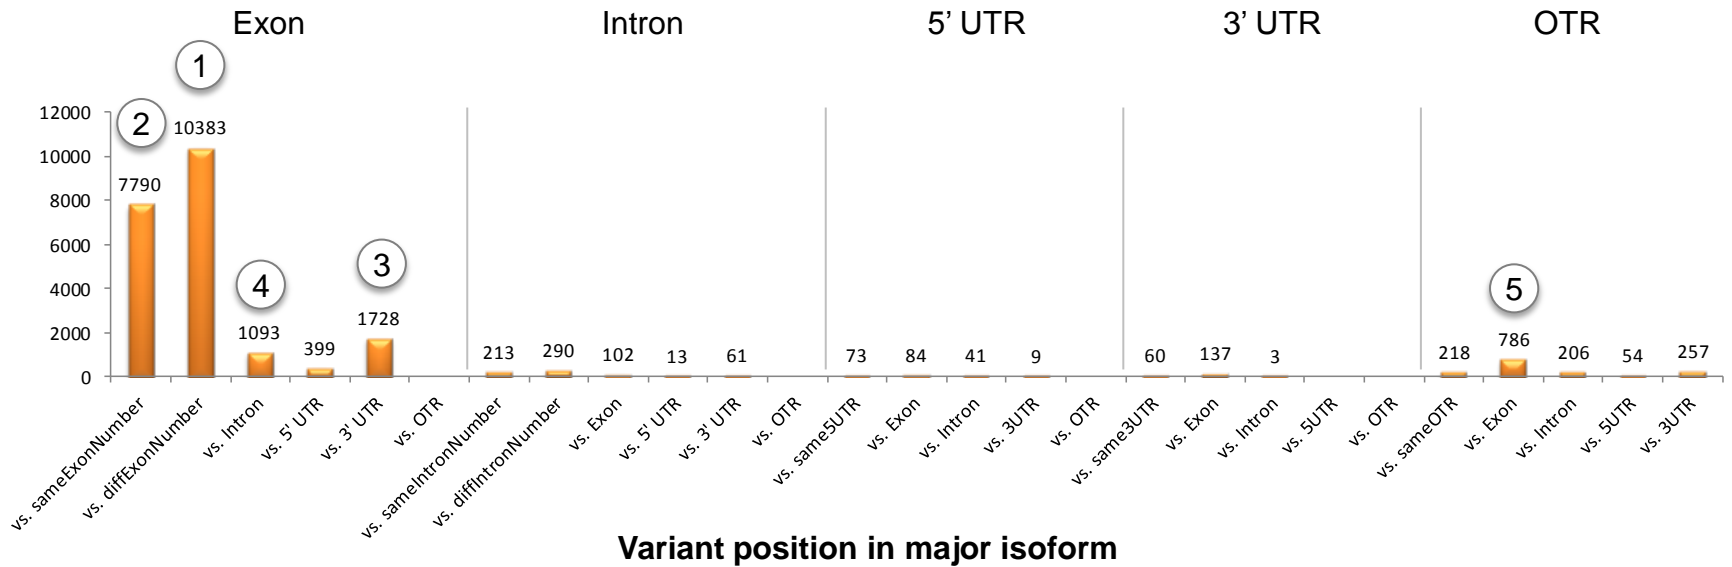

Total variants examined = 147,540

Total mismatched cases between major and canonical isoforms = 29,669

Mismatched cases that canonical isoform is available = 24,000

Rank 1 =  $10,383 / 147,540 * 100 = 7.0\%$  → Annotations were changed in 110 cases (0.07%).

Rank 2 =  $7,790 / 147,540 * 100 = 5.3\%$

Rank 3 =  $1,728 / 147,540 * 100 = 1.2\%$

Rank 4 =  $1,093 / 147,540 * 100 = 0.7\%$

Rank 5 =  $786 / 147,540 * 100 = 0.5\%$

## Variant position in APPRIS principal isoform

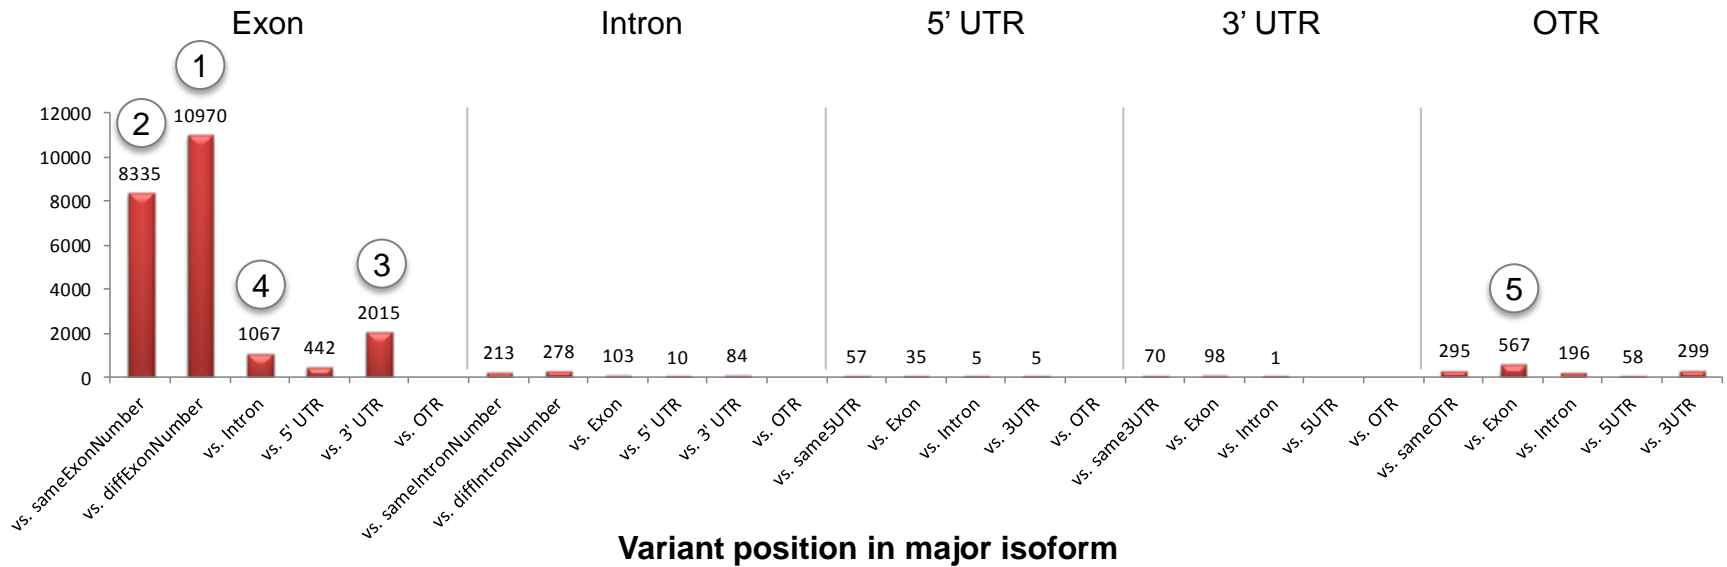

Total variants examined = 147,540

Total mismatched cases between major and principal isoforms = 29,669

Mismatched cases that canonical isoform is available = 25,203

Rank 1 =  $10,970 / 147,540 * 100 = 7.4\%$  → Annotations were changed in 467 cases (0.3%).

Rank 2 =  $8,335 / 147,540 * 100 = 5.6\%$

Rank 3 =  $2,015 / 147,540 * 100 = 1.4\%$

Rank 4 =  $1,067 / 147,540 * 100 = 0.7\%$

Rank 5 =  $567 / 147,540 * 100 = 0.4\%$
